# Supplementary material for: The Interactive Effects of Severe Vitamin D Deficiency and Iodine Nutrition Status on the Risk of Thyroid Disorder in Pregnant Women
Source: MDPI journal article supplement (doi:10.3390/nu14214484), 2022-10-25
Supplement: s1 [file s1]

## **Supplementary Material for**

# **The interactive effects of severe vitamin D deficiency and iodine nutrition status on the risk of thyroid disorder in pregnant women**

Wei Lu<sup>1</sup>, Zhengyuan Wang<sup>1</sup>, Zhuo Sun<sup>1</sup>, Zehuan Shi<sup>1</sup>, Qi Song<sup>1</sup>, Xueying Cui<sup>1</sup>, Liping Shen<sup>1</sup>, Mengying Qu<sup>1</sup>, Shupeng Mai<sup>1</sup> and Jiajie Zang \*

1 Division of Health Risk Factors Monitoring and Control, Shanghai Municipal Center for Disease Control and Prevention, Shanghai 200336, China;

\*Correspondence: zangjiajie@scdc.sh.cn (J.Z.) ; Tel. : +86 - 02162758710

**Table S1.** Interaction between low UIC and vitamin D deficiency on the risk of hypothyroidism/TgAb/TPOAb/TrAb positive in the first trimester

| Vitamin D (ng/ml)                                  | UIC: 150 – 249 ug/L       |                  | UIC < 150 ug/L            |                  | OR for UIC within category of vitamin D | RERI (95%CI)          | AP (95%CI)           |
|----------------------------------------------------|---------------------------|------------------|---------------------------|------------------|-----------------------------------------|-----------------------|----------------------|
|                                                    | Hypothyroidism/Normal(N)  | OR (95%CI)       | Hypothyroidism/Normal(N)  | OR (95%CI)       |                                         |                       |                      |
| ≥ 12                                               | 45/288                    | 1                | 80/544                    | 1.08(0.73, 1.61) | 1.08(0.73, 1.61)                        | -0.352(-1.440, 0.735) | -0.499(-2.15, 1.15)  |
| < 12                                               | 8/44                      | 1.10(0.48, 2.52) | 10/91                     | 0.69(0.33, 1.44) | 1.53(0.53, 4.37)                        | -                     | -                    |
| OR for vitamin D deficiency within category of UIC | -                         | 1.10(0.48, 2.52) | -                         | 0.74(0.37, 1.49) | -                                       | -                     | -                    |
|                                                    | TgAb positive /Normal(N)  | OR (95%CI)       | TgAb positive /Normal(N)  | OR (95%CI)       |                                         |                       |                      |
| ≥ 12                                               | 17/316                    | 1                | 48/576                    | 0.66(0.37, 1.17) | 0.66(0.37, 1.17)                        | 0.652(-1.065, 2.370)  | 0.345(-0.437, 1.128) |
| < 12                                               | 2/50                      | 0.66(0.15, 2.96) | 9/92                      | 1.79(0.76, 4.18) | 0.41(0.08, 2.00)                        | -                     | -                    |
| OR for vitamin D deficiency within category of UIC | -                         | 0.66(0.15, 2.96) | -                         | 1.25(0.59, 2.66) | -                                       | -                     | -                    |
|                                                    | TPOAb positive /Normal(N) | OR (95%CI)       | TPOAb positive /Normal(N) | OR (95%CI)       |                                         |                       |                      |
| ≥ 12                                               | 73/260                    | 1                | 148/476                   | 0.91(0.66, 1.26) | 0.91(0.66, 1.26)                        | 0.072(-0.858, 1.001)  | 0.061(-0.714, 0.835) |
| < 12                                               | 11/41                     | 0.97(0.47, 1.99) | 26/75                     | 1.17(0.69, 1.99) | 0.75(0.32, 1.74)                        | -                     | -                    |
| OR for vitamin D deficiency within category of UIC | -                         | 0.97(0.47, 1.99) | -                         | 1.03(0.63, 1.68) | -                                       | -                     | -                    |
|                                                    | TrAb positive /Normal(N)  | OR (95%CI)       | TrAb positive /Normal(N)  | OR (95%CI)       |                                         |                       |                      |
| ≥ 12                                               | 68/265                    | 1                | 151/473                   | 0.78(0.56, 1.08) | 0.78(0.56, 1.08)                        | 0.128(-0.822, 1.078)  | 0.100(-0.604, 0.800) |
| < 12                                               | 9/43                      | 0.84(0.39, 1.83) | 25/76                     | 1.27(0.74, 2.15) | 0.60(0.24, 1.46)                        | -                     | -                    |
| OR for vitamin D deficiency within category of UIC | -                         | 0.84(0.39, 1.83) | -                         | 1.05(0.64, 1.71) | -                                       | -                     | -                    |

**Table S2.** Interaction between high UIC and vitamin D deficiency on the risk of hypothyroidism/TgAb/TPOAb/TrAb positive in the first trimester

| Vitamin D (ng/ml)                                  | UIC: 150 – 249 ug/L       |                  | UIC $\geq$ 249 ug/L       |                         | OR for UIC within category of vitamin D | RERI (95%CI)               | AP (95%CI)                 |
|----------------------------------------------------|---------------------------|------------------|---------------------------|-------------------------|-----------------------------------------|----------------------------|----------------------------|
|                                                    | Hypothyroidism/Normal(N)  | OR (95%CI)       | Hypothyroidism/Normal(N)  | OR (95%CI)              |                                         |                            |                            |
| $\geq$ 12                                          | 45/288                    | 1                | 31/249                    | 0.80(0.49, 1.31)        | 0.80(0.49, 1.31)                        | 0.434(-1.140, 2.008)       | 0.287(-0.614, 1.189)       |
| < 12                                               | 8/44                      | 1.10(0.48, 2.52) | 8/35                      | 1.38(0.59, 3.19)        | 1.61(0.50, 5.21)                        | -                          | -                          |
| OR for vitamin D deficiency within category of UIC | -                         | 1.10(0.48, 2.52) | -                         | 1.90(0.79, 4.58)        | -                                       | -                          | -                          |
|                                                    | TgAb positive /Normal(N)  | OR (95%CI)       | TgAb positive /Normal(N)  | OR (95%CI)              |                                         |                            |                            |
| $\geq$ 12                                          | 17/316                    | 1                | 16/264                    | 1.03(0.50, 2.09)        | 1.03(0.50, 2.09)                        | -                          | -                          |
| < 12                                               | 2/50                      | 0.66(0.15, 2.96) | 0/43                      | -                       | -                                       | -                          | -                          |
| OR for vitamin D deficiency within category of UIC | -                         | 0.66(0.15, 2.96) | -                         | -                       | -                                       | -                          | -                          |
|                                                    | TPOAb positive /Normal(N) | OR (95%CI)       | TPOAb positive /Normal(N) | OR (95%CI)              |                                         |                            |                            |
| $\geq$ 12                                          | 73/260                    | 1                | 73/207                    | 1.21(0.83, 1.76)        | 1.21(0.83, 1.76)                        | -0.139(-1.288, 1.009)      | -0.127(-1.232, 0.978)      |
| < 12                                               | 11/41                     | 0.97(0.47, 1.99) | 10/33                     | 1.10(0.51, 2.36)        | 1.08(0.37, 3.12)                        | -                          | -                          |
| OR for vitamin D deficiency within category of UIC | -                         | 0.97(0.47, 1.99) | -                         | 0.84(0.39, 1.83)        | -                                       | -                          | -                          |
|                                                    | TrAb positive /Normal(N)  | OR (95%CI)       | TrAb positive /Normal(N)  | OR (95%CI)              |                                         |                            |                            |
| $\geq$ 12                                          | 68/265                    | 1                | 55/225                    | 0.94(0.63, 1.41)        | 0.94(0.63, 1.41)                        | <b>1.910(0.054, 3.766)</b> | <b>0.700(0.367, 1.032)</b> |
| < 12                                               | 9/43                      | 0.84(0.39, 1.83) | 17/26                     | <b>2.62(1.32, 5.22)</b> | <b>3.55(1.32, 9.54)</b>                 | -                          | -                          |
| OR for vitamin D deficiency within category of UIC | -                         | 0.84(0.39, 1.83) | -                         | <b>2.66(1.33, 5.32)</b> | -                                       | -                          | -                          |

Bold indicates statistical significance after adjustment for age, BMI, annual household income, educational level, gestation week, season, smoking and drinking status as well as vitamin D intake

**Table S3.** Interaction between low UIC and vitamin D deficiency on the risk of hypothyroidism/TgAb/TPOAb/TrAb positive in the second trimester

| Vitamin D (ng/ml)                                  | UIC: 150 - 249 ug/L       |                  | UIC < 150 ug/L            |                         | OR for UIC within category of vitamin D | RERI (95%CI)         | AP (95%CI)           |
|----------------------------------------------------|---------------------------|------------------|---------------------------|-------------------------|-----------------------------------------|----------------------|----------------------|
|                                                    | Hypothyroidism/Normal(N)  | OR (95%CI)       | Hypothyroidism/Normal(N)  | OR (95%CI)              |                                         |                      |                      |
| ≥ 12                                               | 35/321                    | 1                | 71/658                    | 0.98(0.64, 1.51)        | 0.98(0.64, 1.51)                        | 0.804(-0.261, 1.871) | 0.575(-0.043, 1.195) |
| < 12                                               | 3/48                      | 0.62(0.18, 2.12) | 14/94                     | 1.38(0.71, 2.69)        | 0.32(0.08, 1.29)                        | -                    | -                    |
| OR for vitamin D deficiency within category of UIC | -                         | 0.62(0.18, 2.12) | -                         | 1.35(0.73, 2.51)        | -                                       | -                    | -                    |
|                                                    | TgAb positive /Normal(N)  | OR (95%CI)       | TgAb positive /Normal(N)  | OR (95%CI)              |                                         |                      |                      |
| ≥ 12                                               | 17/339                    | 1                | 29/700                    | 1.27(0.69, 2.36)        | 1.27(0.69, 2.36)                        | -                    | -                    |
| < 12                                               | 0/51                      | -                | 6/102                     | 1.14(0.43, 2.98)        | -                                       | -                    | -                    |
| OR for vitamin D deficiency within category of UIC | -                         | -                | -                         | 1.49(0.60, 3.70)        | -                                       | -                    | -                    |
|                                                    | TPOAb positive /Normal(N) | OR (95%CI)       | TPOAb positive /Normal(N) | OR (95%CI)              |                                         |                      |                      |
| ≥ 12                                               | 74/282                    | 1                | 120/609                   | <b>1.39(1.01, 1.93)</b> | <b>1.39(1.01, 1.93)</b>                 | 0.085(-0.780, 0.949) | 0.096(-0.872, 1.064) |
| < 12                                               | 12/39                     | 1.16(0.57, 2.37) | 21/87                     | 0.90(0.52, 1.56)        | 1.36(0.59, 3.09)                        | -                    | -                    |
| OR for vitamin D deficiency within category of UIC | -                         | 1.16(0.57, 2.37) | -                         | 1.24(0.74, 2.09)        | -                                       | -                    | -                    |
|                                                    | TrAb positive /Normal(N)  | OR (95%CI)       | TrAb positive /Normal(N)  | OR (95%CI)              |                                         |                      |                      |
| ≥ 12                                               | 86/270                    | 1                | 145/584                   | 1.30(0.95, 1.76)        | 1.30(0.95, 1.76)                        | 0.029(-0.918, 0.977) | 0.027(-0.845, 0.902) |
| < 12                                               | 15/36                     | 1.24(0.64, 2.41) | 28/80                     | 1.09(0.66, 1.79)        | 1.35(0.62, 2.91)                        | -                    | -                    |
| OR for vitamin D deficiency within category of UIC | -                         | 1.24(0.64, 2.41) | -                         | 1.41(0.88, 2.27)        | -                                       | -                    | -                    |

**Table S4.** Interaction between high UIC and vitamin D deficiency on the risk of hypothyroidism/TgAb/TPOAb/TrAb positive in the second trimester

| Vitamin D (ng/ml)                                  | UIC: 150 – 249 ug/L       |                  | UIC $\geq$ 249 ug/L       |                          | OR for UIC within category of vitamin D | RERI (95%CI)          | AP (95%CI)            |
|----------------------------------------------------|---------------------------|------------------|---------------------------|--------------------------|-----------------------------------------|-----------------------|-----------------------|
|                                                    | Hypothyroidism/Normal(N)  | OR (95%CI)       | Hypothyroidism/Normal(N)  | OR (95%CI)               |                                         |                       |                       |
| $\geq 12$                                          | 35/321                    | 1                | 28/209                    | 1.17(0.69, 1.99)         | 1.17(0.69, 1.99)                        | -0.030(-1.243, 1.183) | -0.044(-1.820, 1.733) |
| < 12                                               | 3/48                      | 0.62(0.18, 2.12) | 3/38                      | 0.75(0.21, 2.66)         | 1.74(0.27, 11.23)                       | -                     | -                     |
| OR for vitamin D deficiency within category of UIC | -                         | 0.62(0.18, 2.12) | -                         | 0.54(0.16, 1.91)         | -                                       | -                     | -                     |
|                                                    | TgAb positive /Normal(N)  | OR (95%CI)       | TgAb positive /Normal(N)  | OR (95%CI)               |                                         |                       |                       |
| $\geq 12$                                          | 17/339                    | 1                | 8/229                     | 0.76(0.32, 1.80)         | 0.76(0.32, 1.80)                        | -                     | -                     |
| < 12                                               | 0/51                      | -                | 5/36                      | 2.94(0.98, 8.84)         | -                                       | -                     | -                     |
| OR for vitamin D deficiency within category of UIC | -                         | -                | -                         | <b>3.53(1.14, 11.98)</b> | -                                       | -                     | -                     |
|                                                    | TPOAb positive /Normal(N) | OR (95%CI)       | TPOAb positive /Normal(N) | OR (95%CI)               |                                         |                       |                       |
| $\geq 12$                                          | 74/282                    | 1                | 41/196                    | 0.78(0.50, 1.20)         | 0.78(0.50, 1.20)                        | 0.244(-0.874, 1.369)  | 0.222(-0.708, 1.15)   |
| < 12                                               | 12/39                     | 1.16(0.57, 2.37) | 11/30                     | 1.15(0.54, 2.45)         | 0.96(0.35, 2.59)                        | -                     | -                     |
| OR for vitamin D deficiency within category of UIC | -                         | 1.16(0.57, 2.37) | -                         | 1.42(0.64, 3.15)         | -                                       | -                     | -                     |
|                                                    | TrAb positive /Normal(N)  | OR (95%CI)       | TrAb positive /Normal(N)  | OR (95%CI)               |                                         |                       |                       |
| $\geq 12$                                          | 86/270                    | 1                | 48/189                    | 0.77(0.52, 1.16)         | 0.77(0.52, 1.16)                        | -0.064(-1.161, 1.033) | -0.066(-1.228, 1.095) |
| < 12                                               | 15/36                     | 1.24(0.64, 2.41) | 10/31                     | 0.95(0.44, 2.05)         | 0.71(0.27, 1.8)                         | -                     | -                     |
| OR for vitamin D deficiency within category of UIC | -                         | 1.24(0.64, 2.41) | -                         | 1.27(0.57, 2.80)         | -                                       | -                     | -                     |

Bold indicates statistical significance after adjustment for age, BMI, annual household income, educational level, gestation week, season, smoking and drinking status as well as vitamin D intake

**Table S5.** Interaction between low UIC and vitamin D deficiency on the risk of hypothyroidism/TgAb/TPOAb/TrAb positive in the third trimester

| Vitamin D (ng/ml)                                  | UIC: 150 – 249 ug/L       |                  | UIC < 150 ug/L            |                   | OR for UIC within category of vitamin D | RERI (95%CI)          | AP (95%CI)                 |
|----------------------------------------------------|---------------------------|------------------|---------------------------|-------------------|-----------------------------------------|-----------------------|----------------------------|
|                                                    | Hypothyroidism/Normal(N)  | OR (95%CI)       | Hypothyroidism/Normal(N)  | OR (95%CI)        |                                         |                       |                            |
| ≥ 12                                               | 43/232                    | 1                | 97/619                    | 1.20(0.81, 1.78)  | 1.20(0.81, 1.78)                        | -0.587(-1.708, 0.535) | -1.414(-4.452, 1.624)      |
| < 12                                               | 8/35                      | 1.20(0.51, 2.83) | 7/86                      | 0.42(0.18, 1.00)  | 2.63(0.80, 8.65)                        | -                     | -                          |
| OR for vitamin D deficiency within category of UIC | -                         | 1.20(0.51, 2.83) | -                         | 0.52(0.23, 1.16)  | -                                       | -                     | -                          |
|                                                    | TgAb positive /Normal(N)  | OR (95%CI)       | TgAb positive /Normal(N)  | OR (95%CI)        |                                         |                       |                            |
| ≥ 12                                               | 3/272                     | 1                | 18/698                    | 0.42(0.12, 1.46)  | 0.42(0.12, 1.46)                        | -                     | -                          |
| < 12                                               | 0/43                      | -                | 2/91                      | 1.83(0.29, 11.61) | -                                       | -                     | -                          |
| OR for vitamin D deficiency within category of UIC | -                         | -                | -                         | 0.89(0.20, 4.02)  | -                                       | -                     | -                          |
|                                                    | TPOAb positive /Normal(N) | OR (95%CI)       | TPOAb positive /Normal(N) | OR (95%CI)        |                                         |                       |                            |
| ≥ 12                                               | 41/234                    | 1                | 142/574                   | 0.71(0.48, 1.03)  | 0.71(0.48, 1.03)                        | -0.042(-0.924, 0.841) | -0.048(-1.08, 0.987)       |
| < 12                                               | 3/40                      | 0.39(0.11, 1.37) | 12/81                     | 0.87(0.43, 1.74)  | 0.50(0.13, 1.94)                        | -                     | -                          |
| OR for vitamin D deficiency within category of UIC | -                         | 0.39(0.11, 1.37) | -                         | 0.59(0.31, 1.12)  | -                                       | -                     | -                          |
|                                                    | TrAb positive /Normal(N)  | OR (95%CI)       | TrAb positive /Normal(N)  | OR (95%CI)        |                                         |                       |                            |
| ≥ 12                                               | 47/228                    | <b>1</b>         | 156/560                   | 0.74(0.51, 1.06)  | 0.74(0.51, 1.06)                        | 0.859(-0.214, 1.932)  | <b>0.465(0.005, 0.924)</b> |
| < 12                                               | 5/38                      | 0.57(0.21, 1.57) | 25/68                     | 1.75(0.99, 3.08)  | <b>0.26(0.08, 0.82)</b>                 | -                     | -                          |
| OR for vitamin D deficiency within category of UIC | -                         | 0.57(0.21, 1.57) | -                         | 1.34(0.81, 2.20)  | -                                       | -                     | -                          |

Bold indicates statistical significance after adjustment for age, BMI, annual household income, educational level, gestation week, season, smoking and drinking status as well as vitamin D intake

**Table S6.** Interaction between high UIC and vitamin D deficiency on the risk of hypothyroidism/TgAb/TPOAb/TrAb positive in the third trimester

| Vitamin D (ng/ml)                                  | UIC: 150 – 249 ug/L       |                  | UIC $\geq$ 249 ug/L       |                          | OR for UIC within category of vitamin D | RERI (95%CI)         | AP (95%CI)                 |
|----------------------------------------------------|---------------------------|------------------|---------------------------|--------------------------|-----------------------------------------|----------------------|----------------------------|
|                                                    | Hypothyroidism/Normal(N)  | OR (95%CI)       | Hypothyroidism/Normal(N)  | OR (95%CI)               |                                         |                      |                            |
| $\geq$ 12                                          | 43/232                    | 1                | 27/151                    | 0.92(0.54, 1.58)         | 0.92(0.54, 1.58)                        | 1.238(-1.226, 3.702) | 0.534(-0.105, 1.174)       |
| < 12                                               | 8/35                      | 1.20(0.51, 2.83) | 6/13                      | 2.43(0.86, 6.89)         | 1.79(0.47, 6.85)                        | -                    | -                          |
| OR for vitamin D deficiency within category of UIC | -                         | 1.20(0.51, 2.83) | -                         | 2.66(0.92, 7.71)         | -                                       | -                    | -                          |
|                                                    | Tgab positive /Normal(N)  | OR (95%CI)       | Tgab positive /Normal(N)  | OR (95%CI)               |                                         |                      |                            |
| $\geq$ 12                                          | 3/272                     | 1                | 9/169                     | <b>4.02(1.04, 15.61)</b> | <b>4.02(1.04, 15.61)</b>                | -                    | -                          |
| < 12                                               | 0/43                      | -                | 0/19                      | -                        | -                                       | -                    | -                          |
| OR for vitamin D deficiency within category of UIC | -                         | -                | -                         | -                        | -                                       | -                    | -                          |
|                                                    | TPOAb positive /Normal(N) | OR (95%CI)       | TPOAb positive /Normal(N) | OR (95%CI)               |                                         |                      |                            |
| $\geq$ 12                                          | 41/234                    | 1                | 34/144                    | 1.24(0.74, 2.07)         | 1.24(0.74, 2.07)                        | 0.791(-0.956, 2.538) | 0.561(-0.177, 1.298)       |
| < 12                                               | 3/40                      | 0.39(0.11, 1.37) | 4/15                      | 1.39(0.42, 4.69)         | 3.63(0.66, 20.08)                       | -                    | -                          |
| OR for vitamin D deficiency within category of UIC | -                         | 0.39(0.11, 1.37) | -                         | 1.32(0.39, 4.47)         | -                                       | -                    | -                          |
|                                                    | Trab positive /Normal(N)  | OR (95%CI)       | Trab positive /Normal(N)  | OR (95%CI)               |                                         |                      |                            |
| $\geq$ 12                                          | 47/228                    | <b>1</b>         | 31/147                    | 0.95(0.57, 1.58)         | 0.95(0.57, 1.58)                        | 2.123(-0.451, 4.697) | <b>0.829(0.512, 1.146)</b> |
| < 12                                               | 5/38                      | 0.57(0.21, 1.57) | 7/12                      | 2.70(0.96, 7.54)         | <b>5.95(1.31, 27.05)</b>                | -                    | -                          |
| OR for vitamin D deficiency within category of UIC | -                         | 0.57(0.21, 1.57) | -                         | <b>3.22(1.10, 9.45)</b>  | -                                       | -                    | -                          |

Bold indicates statistical significance after adjustment for age, BMI, annual household income, educational level, gestation week, season, smoking and drinking status as well as vitamin D intake
